# Supplementary material for: Sustained Weight Loss and Risk of Breast Cancer in Women 50 Years and Older: A Pooled Analysis of Prospective Data
Source: Oxford University Press journal article supplement (doi:10.1093/jnci/djz226), 2019-12-11
Supplement: djz226_supplementary_data.pdf [file djz226_supplementary_data.pdf]

Supplementary Table 1. Associations between weight change and risk of breast cancer by cohort among women aged 50 years or older in the Pooling Project of Prospective Studies of Diet and Cancer.

| Interval 1<br>(weight 2 – weight 1) <sup>†</sup>       |                          | Lost ≤4.5kg                          |                                |                                                           | Stable weight<br>(within +/- 2 kg) | Gained ≥4.5kg                               |                                |                                              | Other categories                               |
|--------------------------------------------------------|--------------------------|--------------------------------------|--------------------------------|-----------------------------------------------------------|------------------------------------|---------------------------------------------|--------------------------------|----------------------------------------------|------------------------------------------------|
| Interval 2<br>(weight 3 – weight 2) <sup>†</sup>       |                          | Kept the weight off/lost more weight | Some regain of the lost weight | Gained all previously lost weight back/gained more weight | Stable weight<br>(within +/- 2 kg) | Lost all previously gained weight/lost more | Lost some of the weight gained | Kept the gained weight on/gained more weight | (e.g., smaller amounts of weight gain or loss) |
| CLUE II: Campaign Against Cancer and Heart Disease     | Cases<br>HR*<br>(95% CI) | 2<br>N/A <sup>‡</sup><br>--          | 1<br>N/A <sup>‡</sup><br>--    | 3<br>N/A <sup>‡</sup><br>--                               | 7<br>1.00<br>ref                   | 5<br>2.92<br>(0.89-9.55)                    | 7<br>2.25<br>(0.77-6.56)       | 19<br>1.48<br>(0.60-3.63)                    | 42<br>1.91<br>(0.85-4.31)                      |
| Cancer Prevention Study II Nutrition Cohort            | Cases<br>HR*<br>(95% CI) | 59<br>0.77<br>(0.58-1.03)            | 38<br>0.96<br>(0.68-1.35)      | 45<br>0.90<br>(0.65-1.25)                                 | 292<br>1.00<br>ref                 | 44<br>0.90<br>(0.65-1.25)                   | 51<br>0.99<br>(0.73-1.33)      | 192<br>1.07<br>(0.89-1.29)                   | 717<br>0.98<br>(0.85-1.13)                     |
| Iowa Women’s Health Study                              | Cases<br>HR*<br>(95% CI) | 71<br>0.89<br>(0.67-1.18)            | 34<br>0.86<br>(0.59-1.24)      | 33<br>0.89<br>(0.61-1.29)                                 | 177<br>1.00<br>ref                 | 40<br>0.93<br>(0.66-1.32)                   | 49<br>0.98<br>(0.71-1.35)      | 186<br>1.23<br>(1.00-1.51)                   | 527<br>0.97<br>(0.82-1.15)                     |
| Japan Public Health Center-Based Study Cohort I and II | Cases<br>HR*<br>(95% CI) | 6<br>1.00<br>(0.43-2.33)             | 1<br>N/A <sup>‡</sup><br>--    | 4<br>N/A <sup>‡</sup><br>--                               | 77<br>1.00<br>ref                  | 1<br>N/A <sup>‡</sup><br>--                 | 0<br>N/A <sup>‡</sup><br>--    | 8<br>1.36<br>(0.65-2.82)                     | 59<br>0.84<br>(0.60-1.18)                      |
| Melbourne Collaborative Cohort Study                   | Cases<br>HR*<br>(95% CI) | 7<br>0.87<br>(0.37-2.05)             | 8<br>1.20<br>(0.53-2.74)       | 14<br>1.17<br>(0.60-2.28)                                 | 31<br>1.00<br>ref                  | 2<br>N/A <sup>‡</sup><br>--                 | 1<br>N/A <sup>‡</sup><br>--    | 8<br>0.86<br>(0.39-1.93)                     | 102<br>0.95<br>(0.62-1.45)                     |
| New York University Women’s Health Study               | Cases<br>HR*<br>(95% CI) | 12<br>0.72<br>(0.38-1.36)            | 15<br>1.62<br>(0.90-2.91)      | 6<br>1.09<br>(0.46-2.58)                                  | 59<br>1.00<br>ref                  | 9<br>1.42<br>(0.69-2.93)                    | 12<br>0.96<br>(0.50-1.86)      | 51<br>1.35<br>(0.91-1.98)                    | 146<br>1.06<br>(0.78-1.45)                     |
| Nurses’ Health Study                                   | Cases<br>HR*<br>(95% CI) | 83<br>0.86<br>(0.67-1.09)            | 42<br>0.80<br>(0.58-1.11)      | 64<br>0.92<br>(0.70-1.21)                                 | 349<br>1.00<br>ref                 | 80<br>1.11<br>(0.86-1.41)                   | 97<br>1.05<br>(0.84-1.32)      | 437<br>1.11<br>(0.96-1.28)                   | 1002<br>1.00<br>(0.88-1.13)                    |
| Women’s Health Study                                   | Cases<br>HR*<br>(95% CI) | 25<br>0.88<br>(0.55-1.38)            | 14<br>0.87<br>(0.49-1.54)      | 20<br>1.05<br>(0.64-1.74)                                 | 88<br>1.00<br>ref                  | 30<br>0.63<br>(0.41-0.96)                   | 33<br>0.77<br>(0.51-1.16)      | 115<br>1.04<br>(0.78-1.38)                   | 268<br>0.87<br>(0.68-1.11)                     |
| Women’s Health Initiative Clinical Trial               | Cases<br>HR*<br>(95% CI) | 45<br>0.75<br>(0.53-1.05)            | 32<br>1.02<br>(0.69-1.49)      | 29<br>0.89<br>(0.60-1.33)                                 | 154<br>1.00<br>ref                 | 30<br>0.85<br>(0.57-1.26)                   | 39<br>1.17<br>(0.82-1.66)      | 102<br>1.04<br>(0.81-1.34)                   | 472<br>0.95<br>(0.79-1.14)                     |
| TOTAL CASES<br>Pooled Hazard Ratio                     | Cases<br>HR*<br>(95% CI) | 310<br>0.83<br>(0.73-0.94)           | 185<br>0.94<br>(0.80-1.10)     | 218<br>0.94<br>(0.81-1.09)                                | 1234<br>1.00<br>ref                | 241<br>0.98<br>(0.79-1.13)                  | 289<br>1.01<br>(0.89-1.16)     | 1118<br>1.12<br>(1.03-1.22)                  | 3335<br>0.97<br>(0.91-1.04)                    |
| p-heterogeneity<br>I-squared                           |                          | p=0.99<br>0%                         | p=0.64<br>0%                   | p=0.98<br>0%                                              | N/A<br>--                          | p=0.21<br>29%                               | p=0.64<br>0%                   | p=0.90<br>0%                                 | p=0.78<br>0%                                   |

Abbreviations: kg, kilogram; HR, hazard ratio; CI, confidence interval; N/A, not applicable

\*Cox models were stratified by cohort, age, and calendar year at the start of breast cancer follow-up and adjusted for body mass index at the start of Interval 1, physical activity at the start of Interval 1, and postmenopausal hormone therapy use at start of breast cancer follow-up.

<sup>†</sup>Weight change over both intervals modeled as a single categorical variable reflecting the weight change pattern over ~ten years. Weight change intervals were each ~5 years (Median across studies: 5.2 years for Interval 1 and 4.6 years for Interval 2). Categories of weight change in this table were collapsed from the weight change categories in the main tables because of insufficient sample size for most categories in the individual studies

<sup>‡</sup>Hazard ratios were not reported for categories with fewer than 5 cases.

<sup>§</sup>All statistical tests are two-sided

Supplementary Table 2. Change in hazard ratios when covariate groups were added to the model for weight change and breast cancer among women aged 50 years or older in the Pooling Project of Prospective Studies of Diet and Cancer.

| Weight change<br>Interval 1 <sup>  </sup><br>(Weight 2 – Weight 1) <sup>§</sup> | Weight change<br>Interval 2 <sup>  </sup><br>(Weight 3 – Weight 2) <sup>§</sup> | Model 1*<br>Age, cohort,<br>calendar year only<br>HR (95% CI) | Model 2 <sup>†</sup><br>Model 1+ BMI, HT,<br>PA<br>HR (95% CI) | Model 3 <sup>‡</sup><br>Full* model<br>HR (95% CI) | % HR change<br>from<br>Model 1 to Model 2 | % HR change<br>from<br>Model 2 to Model 3 |
|---------------------------------------------------------------------------------|---------------------------------------------------------------------------------|---------------------------------------------------------------|----------------------------------------------------------------|----------------------------------------------------|-------------------------------------------|-------------------------------------------|
| Weight loss >2-4.5kg                                                            | Kept the weight off/lost<br>more weight                                         | 0.91 (0.81-1.03)                                              | 0.87 (0.77-0.99)                                               | 0.87 (0.77-0.98)                                   | 4%                                        | 0%                                        |
| Weight loss >4.5-<9kg                                                           |                                                                                 | 0.90 (0.78-1.03)                                              | 0.84 (0.73-0.96)                                               | 0.83 (0.72-0.95)                                   | 7%                                        | 1%                                        |
| Weight loss ≥9kg                                                                |                                                                                 | 0.83 (0.66-1.06)                                              | 0.74 (0.58-0.94)                                               | 0.74 (0.58-0.94)                                   | 11%                                       | 0%                                        |
| Weight loss >2-4.5kg                                                            | Some regain of the lost<br>weight                                               | N/A <sup>‡</sup>                                              | N/A <sup>‡</sup>                                               | N/A <sup>‡</sup>                                   | --                                        | --                                        |
| Weight loss >4.5-<9kg                                                           |                                                                                 | 1.13 (0.92-1.38)                                              | 1.06 (0.87-1.30)                                               | 1.05 (0.86-1.28)                                   | 6%                                        | 1%                                        |
| Weight loss ≥9kg                                                                |                                                                                 | 0.87 (0.69-1.09)                                              | 0.77 (0.62-0.97)                                               | 0.76 (0.61-0.96)                                   | 11%                                       | 1%                                        |
| Weight loss >2-4.5kg                                                            | Gained all previously lost<br>weight back/gained more<br>weight                 | 0.97 (0.86-1.10)                                              | 0.94 (0.83-1.06)                                               | 0.93 (0.83-1.05)                                   | 3%                                        | 1%                                        |
| Weight loss >4.5-<9kg                                                           |                                                                                 | 0.99 (0.84-1.16)                                              | 0.91 (0.78-1.07)                                               | 0.91 (0.78-1.07)                                   | 8%                                        | 0%                                        |
| Weight loss ≥9kg                                                                |                                                                                 | 1.15 (0.86-1.54)                                              | 1.02 (0.76-1.37)                                               | 1.02 (0.76-1.37)                                   | 11%                                       | 0%                                        |
| Stable weight<br>(within +/- 2kg)                                               | Lost > 2kg                                                                      | 0.96 (0.86-1.06)                                              | 0.92 (0.83-1.02)                                               | 0.92 (0.83-1.02)                                   | 4%                                        | 0%                                        |
|                                                                                 | Stable weight (within +/- 2kg)                                                  | 1.00 ref                                                      | 1.00 ref                                                       | 1.00 ref                                           | --                                        | --                                        |
|                                                                                 | Gain >2kg                                                                       | 1.07 (0.98-1.17)                                              | 1.05 (0.96-1.15)                                               | 1.05 (0.96-1.15)                                   | 2%                                        | 0%                                        |
| Weight gain >2-4.5kg                                                            | Lost all previously gained<br>weight/<br>lost more                              | 0.93 (0.83-1.05)                                              | 0.90 (0.81-1.01)                                               | 0.90 (0.81-1.01)                                   | 3%                                        | 0%                                        |
| Weight gain >4.5-<9 kg                                                          |                                                                                 | 0.97 (0.84-1.13)                                              | 0.91 (0.78-1.06)                                               | 0.92 (0.79-1.07)                                   | 6%                                        | -1%                                       |
| Weight gain 9-<13.5 kg                                                          |                                                                                 | 0.95 (0.66-1.37)                                              | 0.87 (0.60-1.26)                                               | 0.85 (0.59-1.23)                                   | 8%                                        | 2%                                        |
| Weight gain ≥13.5 kg                                                            |                                                                                 | N/A <sup>‡</sup>                                              | N/A <sup>‡</sup>                                               | N/A <sup>‡</sup>                                   | --                                        | --                                        |
| Weight gain >2-4.5kg                                                            |                                                                                 | N/A <sup>‡</sup>                                              | N/A <sup>‡</sup>                                               | N/A <sup>‡</sup>                                   | --                                        | --                                        |
| Weight gain >4.5-<9 kg                                                          |                                                                                 | 1.06 (0.90-1.27)                                              | 1.02 (0.86-1.21)                                               | 1.02 (0.86-1.21)                                   | 4%                                        | 0%                                        |
| Weight gain 9-<13.5 kg                                                          | Lost some of the weight<br>gained                                               | 1.00 (0.80-1.25)                                              | 0.95 (0.76-1.18)                                               | 0.94 (0.76-1.18)                                   | 5%                                        | 1%                                        |
| Weight gain ≥13.5 kg                                                            |                                                                                 | 1.09 (0.83-1.42)                                              | 1.01 (0.78-1.33)                                               | 1.00 (0.77-1.31)                                   | 7%                                        | 1%                                        |
| Weight gain >2-4.5kg                                                            |                                                                                 | 1.06 (0.97-1.16)                                              | 1.04 (0.95-1.14)                                               | 1.04 (0.96-1.14)                                   | 2%                                        | 0%                                        |
| Weight gain >4.5-<9 kg                                                          | Kept the gained weight<br>on/gained more weight                                 | 1.15 (1.05-1.26)                                              | 1.12 (1.02-1.22)                                               | 1.12 (1.02-1.23)                                   | 3%                                        | 0%                                        |
| Weight gain 9-<13.5 kg                                                          |                                                                                 | 1.19 (1.03-1.38)                                              | 1.14 (0.99-1.33)                                               | 1.15 (0.99-1.33)                                   | 4%                                        | -1%                                       |
| Weight gain ≥13.5 kg                                                            |                                                                                 | 1.03 (0.81-1.31)                                              | 0.97 (0.76-1.23)                                               | 0.96 (0.76-1.22)                                   | 6%                                        | 1%                                        |

Abbreviations: BMI, body mass index; CI, confidence interval; HR, hazard ratio; HT, hormone therapy; kg, kilogram; N/A, not applicable; PA, physical activity

\*Model 1: Cox models were stratified by cohort, age, and calendar year at the start of breast cancer follow-up. Results are identical to those presented in Table

<sup>†</sup>Model 2: Same as model 1 + body mass index (normal: 18.5-<25, overweight: 25-<30, obese: ≥30 kg/m<sup>2</sup>) at the start of Interval 1, physical activity at the start of Interval 1 (low/no, medium, high as defined by each study), and postmenopausal hormone therapy use (current at the start of breast cancer follow-up, not current). Results are identical to those presented in Table 2.

<sup>‡</sup>Model 3: Full model: Same as model 2 + race (white, black, Asian, other), education (<high school, high school, > high school), smoking status (never, past, current), height (<1.50, 1.50-1.55, 1.55-1.60, 1.60-1.65, ≥1.65 m for the Japan Public Health Center-Based Study Cohort I and II; <1.60, 1.60-1.65, 1.65-1.70, 1.70-1.75, ≥1.75 m for remaining cohorts), alcohol intake (0, >0 <5, 5-<15, 15-<30, ≥30+ grams/day), family history of breast cancer (yes, no), age at menarche (<12, 12, 13, 14, ≥15 years), parity and age at first birth (nulliparous, parous/age at 1<sup>st</sup> birth < 25 years [<30 years for the Women’s Health Study], parous/age at 1<sup>st</sup> birth ≥ 25 years [≥30 years for the Women’s Health Study]), oral contraceptive use (ever, never), history of benign breast disease (yes, no)

<sup>§</sup> All statistical tests are two-sided

Supplementary Table 3. Select baseline characteristics among women aged 50 years or older in 10 cohorts in the Pooling Project of Prospective Studies of Diet and Cancer (DCPP).

| Baseline characteristics (unless otherwise noted)* | Analytic cohort | DCPP population<br>but not in the<br>analytic cohort † |
|----------------------------------------------------|-----------------|--------------------------------------------------------|
| n                                                  | 180,885         | 51,848                                                 |
| Age (years), mean (SD)                             | 59.9 (6.0)      | 60.0 (6.0)                                             |
| Body mass index (kg/m <sup>2</sup> ), mean (SD)    | 26.1 (4.7)      | 26.3 (5.4)                                             |
| Weight (kg), mean (SD)                             | 68.3 (13.6)     | 68.4 (14.7)                                            |
| Height (m), mean (SD)                              | 1.62 (0.07)     | 1.61 (0.08)                                            |
| Age at menarche (years), mean (SD)                 | 13.0 (1.7)      | 13.0 (1.8)                                             |
| Age at 1 <sup>st</sup> birth (years), mean (SD)    | 21.8 (7.7)      | 21.3 (7.8)                                             |
| Physical activity                                  |                 |                                                        |
| Low physical activity, %                           | 42.9            | 48.2                                                   |
| Moderate physical activity, %                      | 29.1            | 25.8                                                   |
| High physical activity, %                          | 28.1            | 26.0                                                   |
| Race/ethnicity                                     |                 |                                                        |
| White, %                                           | 82.6            | 87.5                                                   |
| African American, %                                | 2.1             | 2.0                                                    |
| Hispanic, %                                        | 0.8             | 0.7                                                    |
| Asian, %                                           | 11.2            | 8.7                                                    |
| More than a high school education, %               | 63.6            | 46.1                                                   |
| Current smoker‡, %                                 | 9.9             | 14.9                                                   |
| Current hormone therapy use§, %                    | 30.8            | 35.3                                                   |
| Family history of breast cancer, %                 | 11.5            | 10.1                                                   |
| Ever oral contraceptive use, %                     | 40.2            | 37.7                                                   |
| History of benign breast disease, %                | 26.9            | 24.5                                                   |

Abbreviations: DCPP, Pooling Project of Prospective Studies of Diet and Cancer; kg, kilogram; m, meter; SD, standard deviation

\*Values are means (SD) for continuous variables; percentages for categorical variables, and are standardized to the age distribution of the study population.

†Participants were excluded from the analytic cohort for one of the following: 1) breast cancer diagnosis or death before start of follow-up or 2) missing or extreme values for follow-up 1 or 2 body weight, BMI, or height

‡Current smoking at the start of the weight change interval

§Current postmenopausal hormone therapy use at the start of breast cancer follow-up

Supplementary Table 4. Associations between weight change and risk of breast cancer by postmenopausal hormone therapy (HT) use among postmenopausal women aged 50 years and older in 10 cohorts in the Pooling Project of Prospective Studies of Diet and Cancer

| No current HT use                                |                                                           |       |                  |             | Current HT use |                  |             |
|--------------------------------------------------|-----------------------------------------------------------|-------|------------------|-------------|----------------|------------------|-------------|
| Interval 1<br>(weight 2 – weight 1) <sup>†</sup> | Interval 2<br>(weight 3 – weight 2) <sup>†</sup>          | Cases | HR*              | 95% CI      | Cases          | HR*              | 95% CI      |
| Weight loss >2-≤4.5kg                            | Kept the weight off/lost more weight                      | 200   | 0.82             | (0.70-0.96) | 112            | 0.97             | (0.79-1.20) |
| Weight loss >4.5-<9kg                            |                                                           | 145   | 0.75             | (0.63-0.90) | 73             | 0.98             | (0.76-1.27) |
| Weight loss ≥9kg                                 |                                                           | 45    | 0.68             | (0.50-0.93) | 23             | 0.96             | (0.63-1.47) |
| Weight loss >2-≤4.5kg                            | Some regain of the lost weight                            | 0     | N/A <sup>‡</sup> | --          | 0              | N/A <sup>‡</sup> | --          |
| Weight loss >4.5-<9kg                            |                                                           | 69    | 1.09             | (0.85-1.40) | 31             | 0.99             | (0.68-1.44) |
| Weight loss ≥9kg                                 |                                                           | 50    | 0.73             | (0.55-0.98) | 22             | 0.76             | (0.50-1.18) |
| Weight loss >2-≤4.5kg                            | Gained all previously lost weight back/gained more weight | 203   | 0.97             | (0.83-1.13) | 116            | 0.92             | (0.75-1.13) |
| Weight loss >4.5-<9kg                            |                                                           | 87    | 0.80             | (0.64-1.01) | 71             | 1.16             | (0.90-1.50) |
| Weight loss ≥9kg                                 |                                                           | 31    | 1.05             | (0.73-1.52) | 11             | N/A <sup>‡</sup> | --          |
| Stable weight<br>(within +/- 2kg)                | Lost > 2kg                                                | 332   | 0.90             | (0.79-1.02) | 175            | 0.99             | (0.82-1.18) |
|                                                  | Stable weight (within +/- 2kg)                            | 712   | 1.00             | ref         | 449            | 1.00             | ref         |
|                                                  | Gain >2kg                                                 | 476   | 1.06             | (0.94-1.19) | 328            | 1.05             | (0.91-1.21) |
| Weight gain >2-≤4.5kg                            | Lost all previously gained weight/lost more               | 237   | 0.89             | (0.77-1.04) | 147            | 0.94             | (0.78-1.14) |
| Weight gain >4.5-<9 kg                           |                                                           | 123   | 0.93             | (0.76-1.13) | 65             | 0.91             | (0.70-1.19) |
| Weight gain ≥9-<13.5 kg                          |                                                           | 20    | 0.92             | (0.59-1.44) | 8              | N/A <sup>‡</sup> | --          |
| Weight gain ≥13.5+ kg                            | Lost some of the weight gained                            | 12    | N/A <sup>‡</sup> | --          | 2              | N/A <sup>‡</sup> | --          |
| Weight gain >2-≤4.5kg                            |                                                           | 0     | N/A <sup>‡</sup> | --          | 1              | N/A <sup>‡</sup> | --          |
| Weight gain >4.5-<9 kg                           |                                                           | 88    | 1.05             | (0.83-1.32) | 56             | 1.08             | (0.81-1.43) |
| Weight gain ≥9-<13.5 kg                          |                                                           | 49    | 0.91             | (0.68-1.22) | 33             | 1.05             | (0.74-1.50) |
| Weight gain ≥13.5+ kg                            | Kept the gained weight on/gained more weight              | 39    | 1.06             | (0.76-1.47) | 17             | 0.99             | (0.61-1.61) |
| Weight gain >2-≤4.5kg                            |                                                           | 472   | 1.02             | (0.91-1.15) | 335            | 1.08             | (0.93-1.24) |
| Weight gain >4.5-<9 kg                           |                                                           | 491   | 1.13             | (1.00-1.27) | 314            | 1.15             | (0.99-1.33) |
| Weight gain ≥9-<13.5 kg                          |                                                           | 123   | 1.07             | (0.88-1.30) | 81             | 1.28             | (1.01-1.63) |
| Weight gain ≥13.5+ kg                            |                                                           | 46    | 1.02             | (0.76-1.39) | 23             | 0.90             | (0.59-1.38) |

Abbreviations: kg, kilogram; HR, hazard ratio; HT, postmenopausal hormone therapy; CI, confidence interval; N/A, not applicable

\*Cox models were stratified by cohort, age, and calendar year at the start of breast cancer follow-up and adjusted for body mass index at the start of Interval 1, physical activity at the start of Interval 1, and postmenopausal hormone therapy use at start of breast cancer follow-up.

<sup>†</sup>Weight change over both intervals modeled as a single categorical variable reflecting the weight change pattern over ~ten years. Weight change intervals were each ~5 years (Median across studies: 5.2 years for Interval 1 and 4.6 years for Interval 2).

<sup>‡</sup>Hazard ratios were not reported for categories with fewer than 15 cases.

<sup>§</sup> All statistical tests are two-sided

Supplementary Table 5. Associations between weight change and risk of breast cancer by estrogen receptor status, among women aged 50 years or older in 10 cohorts in the Pooling Project of Prospective Studies of Diet and Cancer.

| Interval 1<br>(weight 2 – weight 1) <sup>†</sup> | Interval 2<br>(weight 3 – weight 2) <sup>†</sup>             | ER <sup>+</sup><br>Cases<br>n=5,348 | HR <sup>*</sup>  | 95% CI       | ER <sup>-</sup><br>Cases<br>n=869 | HR <sup>*</sup>  | 95% CI      |
|--------------------------------------------------|--------------------------------------------------------------|-------------------------------------|------------------|--------------|-----------------------------------|------------------|-------------|
| Weight loss >2-4.5kg                             | Kept the weight off/lost more weight                         | 245                                 | 0.82             | (0.71- 0.94) | 47                                | 1.01             | 0.72-1.40   |
| Weight loss >4.5-<9kg                            |                                                              | 183                                 | 0.83             | (0.71-0.98)  | 29                                | 0.89             | 0.59-1.32   |
| Weight loss ≥9kg                                 |                                                              | 56                                  | 0.72             | (0.55-0.95)  | 9                                 | N/A <sup>‡</sup> | --          |
| Weight loss >2-4.5kg                             | Some regain of the lost weight                               | 0                                   | N/A <sup>‡</sup> | --           | 0                                 | N/A <sup>‡</sup> | --          |
| Weight loss >4.5-<9kg                            |                                                              | 81                                  | 1.06             | (0.84- 1.33) | 11                                | N/A <sup>‡</sup> | --          |
| Weight loss ≥9kg                                 |                                                              | 54                                  | 0.65             | (0.49-0.86)  | 16                                | 1.47             | 0.87-2.49   |
| Weight loss >2-4.5kg                             | Gained all previously lost weight<br>back/gained more weight | 269                                 | 0.94             | (0.82-1.08)  | 42                                | 0.92             | 0.65-1.30   |
| Weight loss >4.5-<9kg                            |                                                              | 130                                 | 0.88             | (0.73-1.06)  | 28                                | 1.28             | 0.85-1.93   |
| Weight loss ≥9kg                                 |                                                              | 41                                  | 1.11             | (0.80-1.52)  | 2                                 | N/A <sup>‡</sup> | --          |
| Stable weight (within +/-<br>2kg)                | Lost > 2kg                                                   | 408                                 | 0.90             | (0.80-1.01)  | 65                                | 0.91             | 0.68-1.23   |
|                                                  | Stable weight (within +/- 2kg)                               | 937                                 | 1.00             | ref          | 155                               | 1.00             | ref         |
|                                                  | Gain >2kg                                                    | 677                                 | 1.06             | (0.96-1.17)  | 108                               | 1.03             | 0.80-1.32   |
| Weight gain >2-4.5kg                             | Lost all previously gained weight/lost<br>more               | 317                                 | 0.90             | (0.79-1.03)  | 53                                | 0.95             | (0.69-1.30) |
| Weight gain >4.5-<9 kg                           |                                                              | 143                                 | 0.83             | (0.69-0.99)  | 23                                | 0.87             | (0.56-1.36) |
| Weight gain 9-<13.5 kg                           |                                                              | 22                                  | 0.84             | (0.55-1.28)  | 5                                 | N/A <sup>‡</sup> | --          |
| Weight gain ≥13.5 kg                             |                                                              | 12                                  | N/A <sup>‡</sup> | --           | 0                                 | N/A <sup>‡</sup> | --          |
| Weight gain >2-4.5kg                             | Lost some of the weight gained                               | 2                                   | N/A <sup>‡</sup> | --           | 0                                 | N/A <sup>‡</sup> | --          |
| Weight gain >4.5-<9 kg                           |                                                              | 112                                 | 1.01             | (0.83-1.22)  | 19                                | 1.01             | (0.62-1.64) |
| Weight gain 9-<13.5 kg                           |                                                              | 61                                  | 0.86             | (0.66-1.12)  | 14                                | N/A <sup>‡</sup> | --          |
| Weight gain ≥13.5 kg                             |                                                              | 45                                  | 1.02             | (0.75-1.38)  | 8                                 | N/A <sup>‡</sup> | --          |
| Weight gain >2-4.5kg                             | Kept the gained weight on/gained more<br>weight              | 673                                 | 1.06             | (0.96-1.17)  | 114                               | 1.10             | (0.86-1.41) |
| Weight gain >4.5-<9 kg                           |                                                              | 654                                 | 1.12             | (1.02-1.25)  | 91                                | 0.96             | (0.74-1.26) |
| Weight gain 9-<13.5 kg                           |                                                              | 166                                 | 1.14             | (0.96-1.35)  | 26                                | 1.10             | (0.72-1.67) |
| Weight gain ≥13.5 kg                             |                                                              | 60                                  | 1.02             | (0.78-1.32)  | 4                                 | N/A <sup>‡</sup> | --          |

Abbreviations: kg, kilogram; ER, estrogen receptor; HR, hazard ratio; CI, confidence interval; N/A, not applicable

\*Cox models were stratified by cohort, age, and calendar year at the start of breast cancer follow-up and adjusted for body mass index at the start of Interval 1, physical activity at the start of Interval 1, and postmenopausal hormone therapy use at start of breast cancer follow-up.

<sup>†</sup>Weight change over both intervals modeled as a single categorical variable reflecting the weight change pattern over ~ten years. Weight change intervals were each ~5 years (Median across studies: 5.2 years for Interval 1 and 4.6 years for Interval 2).

<sup>‡</sup>Hazard ratios were not reported for categories with fewer than 15 cases.

<sup>§</sup>All statistical tests are two-sided

Supplementary Table 6. Associations between weight change and risk of breast cancer by baseline BMI, among women aged 50 years or older in 10 cohorts in the Pooling Project of Prospective Studies of Diet and Cancer.

|                                                  |                                                           | BMI <25 kg/m <sup>2</sup> |                  |             | BMI 25-<30 kg/m <sup>2</sup> |                  |                  | BMI ≥30 kg/m <sup>2</sup> |                  |             |
|--------------------------------------------------|-----------------------------------------------------------|---------------------------|------------------|-------------|------------------------------|------------------|------------------|---------------------------|------------------|-------------|
| Interval 1<br>(weight 2 – weight 1) <sup>†</sup> | Interval 2<br>(weight 3 – weight 2) <sup>†</sup>          | Cases                     | HR               | 95% CI      | Cases                        | HR               | 95% CI           | Cases                     | HR               | 95% CI      |
| Weight loss >2-4.5 kg                            | Kept the weight off/lost more weight                      | 125                       | 0.92             | (0.76-1.11) | 120                          | 0.81             | (0.66-1.00)      | 93                        | 0.96             | (0.73-1.27) |
| Weight loss >4.5-<9 kg                           |                                                           | 60                        | 0.93             | (0.72-1.22) | 88                           | 0.78             | (0.61-0.98)      | 89                        | 0.88             | (0.67-1.16) |
| Weight loss ≥9 kg                                |                                                           | 5                         | N/A <sup>‡</sup> | --          | 24                           | 0.76             | (0.50-1.16)      | 44                        | 0.79             | (0.56-1.12) |
| Weight loss >2-4.5 kg                            | Some regain of the lost weight                            | 0                         | N/A <sup>‡</sup> | --          | 0                            | N/A <sup>‡</sup> | --               | 0                         | N/A <sup>‡</sup> | --          |
| Weight loss >4.5-<9 kg                           |                                                           | 26                        | 1.02             | (0.69-1.51) | 44                           | 0.93             | (0.68-1.28)      | 35                        | 1.34             | (0.91-1.96) |
| Weight loss ≥9 kg                                |                                                           | 8                         | N/A <sup>‡</sup> | --          | 26                           | 0.74             | (0.49-1.10)      | 46                        | 0.81             | (0.57-1.14) |
| Weight loss >2-4.5 kg                            | Gained all previously lost weight back/gained more weight | 132                       | 0.90             | (0.75-1.08) | 151                          | 1.03             | (0.85-1.25)      | 59                        | 0.86             | (0.62-1.18) |
| Weight loss >4.5-<9 kg                           |                                                           | 42                        | 1.00             | (0.73-1.36) | 69                           | 0.84             | (0.65- 1.10)     | 59                        | 0.94             | (0.69-1.29) |
| Weight loss ≥9 kg                                |                                                           | 5                         | N/A <sup>‡</sup> | --          | 15                           | 1.01             | (0.60-1.70)      | 28                        | 0.99             | (0.65-1.51) |
| Stable weight (within +/- 2 kg)                  | Lost > 2kg                                                | 209                       | 0.94             | (0.81-1.10) | 193                          | 0.84             | (0.71-1.01)      | 137                       | 1.00             | (0.78-1.28) |
|                                                  | Stable weight (within +/- 2kg)                            | 765                       | 1.00             | ref         | 350                          | 1.00             | ref              | 119                       | 1.00             | ref         |
|                                                  | Gain >2kg                                                 | 437                       | 1.04             | (0.93-1.18) | 285                          | 1.00             | (0.85-1.17)      | 139                       | 1.23             | (0.96-1.58) |
| Weight gain >2-4.5 kg                            | Lost all previously gained weight/lost more               | 173                       | 0.88             | (0.74-1.04) | 141                          | 0.86             | (0.70-1.04)      | 90                        | 1.07             | (0.81-1.41) |
| Weight gain >4.5-<9 kg                           |                                                           | 51                        | N/A <sup>‡</sup> | (0.60-1.07) | 93                           | 1.10             | (0.87-1.38)      | 54                        | 0.86             | (0.62-1.19) |
| Weight gain 9-<13.5 kg                           |                                                           | 4                         | N/A <sup>‡</sup> | --          | 9                            | N/A <sup>‡</sup> | --               | 16                        | 1.08             | (0.64-1.84) |
| Weight gain ≥13.5 kg                             |                                                           | 2                         | N/A <sup>‡</sup> | --          | 3                            | N/A <sup>‡</sup> | --               | 9                         | N/A <sup>‡</sup> | --          |
| Weight gain >2-4.5 kg                            | Lost some of the weight gained                            | 1                         | N/A <sup>‡</sup> | --          | 1                            | --               | N/A <sup>‡</sup> | 0                         | N/A <sup>‡</sup> | --          |
| Weight gain >4.5-<9 kg                           |                                                           | 58                        | 1.04             | (0.80-1.37) | 59                           | 0.98             | (0.74-1.30)      | 29                        | 1.05             | (0.69-1.59) |
| Weight gain 9-<13.5 kg                           |                                                           | 28                        | 0.93             | (0.64-1.36) | 39                           | 1.08             | (0.77-1.52)      | 18                        | 0.80             | (0.49-1.32) |
| Weight gain ≥13.5 kg                             |                                                           | 12                        | N/A <sup>‡</sup> | --          | 26                           | 1.26             | (0.83-1.90)      | 20                        | 1.03             | (0.64-1.67) |
| Weight gain >2-4.5 kg                            | Kept the gained weight on/gained more weight              | 436                       | 1.03             | (0.91-1.16) | 304                          | 1.06             | (0.91-1.24)      | 109                       | 1.03             | (0.79-1.34) |
| Weight gain >4.5-<9 kg                           |                                                           | 381                       | 1.15             | (1.01-1.30) | 313                          | 1.08             | (0.92-1.26)      | 138                       | 1.11             | (0.87-1.43) |
| Weight gain 9-<13.5 kg                           |                                                           | 75                        | 1.09             | (0.86-1.39) | 89                           | 1.15             | (0.91-1.46)      | 50                        | 1.32             | (0.95-1.85) |
| Weight gain ≥13.5 kg                             |                                                           | 18                        | 0.82             | (0.51-1.32) | 40                           | 1.38             | (0.98-1.93)      | 14                        | N/A <sup>‡</sup> | --          |

Abbreviations: BMI, body mass index; kg, kilogram; HR, hazard ratio; CI, confidence interval; N/A, not applicable

\*Cox models were stratified by cohort, age, and calendar year at the start of breast cancer follow-up and adjusted for physical activity at the start of Interval 1, and postmenopausal hormone therapy use at start of breast cancer follow-up.

\*Weight change over both intervals modeled as a single categorical variable reflecting the weight change pattern over ~ten years. Weight change intervals were each ~5 years (Median across studies: 5.2 years for Interval 1 and 4.6 years for Interval 2).

\*Hazard ratios were not reported for categories with fewer than 15 cases.

§ All statistical tests are two-sided

Supplementary Table 7. Associations between weight change and risk of breast cancer stratified by baseline physical activity level, among women aged 50 years or older in 10 cohorts in the Pooling Project of Prospective Studies of Diet and Cancer.

|                                                  |                                                           | Low PA  |                  |             | Moderate PA |                  |             | High PA |                  |             |
|--------------------------------------------------|-----------------------------------------------------------|---------|------------------|-------------|-------------|------------------|-------------|---------|------------------|-------------|
| Interval 1<br>(weight 2 – weight 1) <sup>†</sup> | Interval 2<br>(weight 3 – weight 2) <sup>†</sup>          | N Cases | HR*              | 95% CI      | N Cases     | HR*              | 95% CI      | N Cases | HR*              | 95% CI      |
| Weight loss >2-4.5 kg                            | Kept the weight off/lost more weight                      | 150     | 0.93             | (0.77-1.13) | 92          | 0.85             | (0.67-1.07) | 71      | 0.98             | (0.62-1.56) |
| Weight loss >4.5-<9 kg                           |                                                           | 105     | 0.90             | (0.73-1.12) | 74          | 0.88             | (0.68-1.13) | 49      | 0.75             | (0.55-1.02) |
| Weight loss ≥9 kg                                |                                                           | 25      | 0.56             | (0.37-0.84) | 25          | 0.94             | (0.61-1.43) | 20      | 0.74             | (0.57-0.96) |
| Weight loss >2-4.5 kg                            | Some regain of the lost weight                            | 0       | N/A <sup>‡</sup> | --          | 0           | N/A <sup>‡</sup> | --          | 0       | N/A <sup>‡</sup> | --          |
| Weight loss >4.5-<9 kg                           |                                                           | 36      | 0.98             | (0.71-1.37) | 20          | 1.28             | (0.91-1.82) | 26      | 0.98             | (0.65-1.48) |
| Weight loss ≥9 kg                                |                                                           | 39      | 0.75             | (0.53-1.06) | 36          | 0.72             | (0.45-1.13) | 20      | 1.01             | (0.64-1.60) |
| Weight loss >2-4.5 kg                            | Gained all previously lost weight back/gained more weight | 137     | 0.98             | (0.81-1.19) | 106         | 0.93             | (0.75-1.16) | 80      | 0.85             | (0.66-1.09) |
| Weight loss >4.5-<9 kg                           |                                                           | 73      | 0.95             | (0.74-1.22) | 59          | 1.06             | (0.80-1.41) | 32      | 0.74             | (0.51-1.07) |
| Weight loss ≥9 kg                                |                                                           | 25      | 1.23             | (0.82-1.86) | 14          | N/A <sup>‡</sup> | --          | 9       | N/A <sup>‡</sup> | --          |
| Stable weight<br>(within +/- 2 kg)               | Lost > 2kg                                                | 219     | 0.94             | (0.80-1.11) | 175         | 1.00             | 0.83-1.20   | 114     | 0.77             | (0.62-0.95) |
|                                                  | Stable weight (within +/- 2kg)                            | 452     | 1.00             | ref         | 357         | 1.00             | ref         | 377     | 1.00             | ref         |
|                                                  | Gain >2kg                                                 | 333     | 1.09             | 0.94-1.26   | 263         | 1.03             | 0.88-1.22   | 224     | 1.01             | (0.85-1.19) |
| Weight gain >2-4.5 kg                            | Lost all previously gained weight/lost more               | 162     | 0.96             | (0.80-1.15) | 120         | 0.84             | (0.68-1.04) | 105     | 0.89             | (0.72-1.11) |
| Weight gain >4.5-<9 kg                           |                                                           | 86      | 0.98             | (0.78-1.24) | 53          | 0.80             | (0.60-1.08) | 50      | 0.89             | (0.66-1.20) |
| Weight gain 9-<13.5 kg                           |                                                           | 20      | 1.35             | (0.85-2.12) | 6           | N/A <sup>‡</sup> | --          | 3       | N/A <sup>‡</sup> | --          |
| Weight gain ≥13.5 kg                             |                                                           | 6       | N/A <sup>‡</sup> | --          | 5           | N/A <sup>‡</sup> | --          | 2       | N/A <sup>‡</sup> | --          |
| Weight gain >2-4.5 kg                            | Lost some of the weight gained                            | 2       | N/A <sup>‡</sup> | --          | 0           | N/A <sup>‡</sup> | --          | 0       | N/A <sup>‡</sup> | --          |
| Weight gain >4.5-<9 kg                           |                                                           | 56      | 0.94             | (0.71-1.15) | 44          | 1.10             | (0.80-1.51) | 37      | 0.97             | 0.69-1.37   |
| Weight gain 9-<13.5 kg                           |                                                           | 32      | 0.88             | (0.62-1.27) | 24          | 0.89             | (0.58-1.35) | 26      | 1.16             | 0.77-1.73   |
| Weight gain ≥13.5 kg                             |                                                           | 28      | 1.16             | (0.78-1.72) | 17          | 1.05             | (0.64-1.71) | 9       | N/A <sup>‡</sup> | --          |
| Weight gain >2-4.5 kg                            | Kept the gained weight on/gained more weight              | 322     | 1.05             | (0.91-1.22) | 269         | 1.06             | (0.90-1.24) | 220     | 1.01             | 0.86-1.20   |
| Weight gain >4.5-<9 kg                           |                                                           | 325     | 1.14             | (0.99-1.32) | 259         | 1.10             | (0.93-1.30) | 219     | 1.15             | (0.97-1.36) |
| Weight gain 9-<13.5 kg                           |                                                           | 94      | 1.22             | (0.97-1.53) | 66          | 1.24             | (0.95-1.61) | 49      | 1.07             | (0.79-1.46) |
| Weight gain ≥13.5 kg                             |                                                           | 34      | 1.14             | (0.80-1.62) | 21          | 0.97             | (0.62-1.51) | 14      | 0.74             | (0.42-1.29) |

Abbreviations: PA, physical activity; kg, kilogram; HR, hazard ratio; CI, confidence interval; N/A, not applicable

\*Cox models were stratified by cohort, age, and calendar year at the start of breast cancer follow-up and adjusted for body mass index at the start of Interval 1 and postmenopausal hormone therapy use at start of breast cancer follow-up.

<sup>†</sup>Weight change intervals were each ~5 years (Median across studies: 5.2 years for Interval 1 and 4.6 years for Interval 2). Weight change over both intervals modeled as a single categorical variable reflecting the weight change pattern over ~ten years

<sup>‡</sup>Hazard ratios were not reported for categories with fewer than 15 cases.

<sup>§</sup>All statistical tests are two sided

Supplementary Table 8. Associations between weight change and risk of breast cancer by weight ascertainment method (self-report, measured), among women aged 50 years or older in 10 cohorts in the Pooling Project of Prospective Studies of Diet and Cancer.

|                                                  |                                                                 | All studies<br>(results in manuscript) |             | Measured <sup>§</sup><br>weight, height |                  |             | Self-reported <sup>  </sup><br>weight, height |                  |             |
|--------------------------------------------------|-----------------------------------------------------------------|----------------------------------------|-------------|-----------------------------------------|------------------|-------------|-----------------------------------------------|------------------|-------------|
| Interval 1<br>(weight 2 – weight 1) <sup>†</sup> | Interval 2<br>(weight 3 – weight 2) <sup>†</sup>                | HR <sup>*</sup>                        | 95% CI      | N<br>cases                              | HR <sup>*</sup>  | 95% CI      | N<br>cases                                    | HR <sup>*</sup>  | 95% CI      |
| Weight loss >2-4.5kg                             | Kept the weight off/<br>lost more weight                        | 0.87                                   | (0.77-0.99) | 69                                      | 0.89             | (0.67-1.18) | 269                                           | 0.87             | (0.76-1.00) |
| Weight loss >4.5-<9kg                            |                                                                 | 0.84                                   | (0.73-0.96) | 40                                      | 0.77             | (0.55-1.10) | 197                                           | 0.85             | (0.73-1.00) |
| Weight loss ≥9kg                                 |                                                                 | 0.74                                   | (0.58-0.94) | 12                                      | N/A <sup>‡</sup> | --          | 61                                            | 0.76             | (0.59-0.99) |
| Weight loss >2-4.5kg                             | Some regain of the lost<br>weight                               | N/A <sup>‡</sup>                       | --          | 0                                       | N/A <sup>‡</sup> | --          | 0                                             | N/A <sup>‡</sup> | --          |
| Weight loss >4.5-<9kg                            |                                                                 | 1.06                                   | (0.87-1.30) | 20                                      | 1.12             | (0.70-1.78) | 85                                            | 1.05             | (0.84-1.31) |
| Weight loss ≥9kg                                 |                                                                 | 0.77                                   | (0.62-0.97) | 20                                      | 0.96             | (0.60-1.54) | 60                                            | 0.73             | (0.56-0.95) |
| Weight loss >2-4.5 kg                            | Gained all previously lost<br>weight back/gained more<br>weight | 0.94                                   | (0.83-1.06) | 64                                      | 0.86             | (0.64-1.15) | 278                                           | 0.95             | (0.83-1.09) |
| Weight loss >4.5-<9 kg                           |                                                                 | 0.91                                   | (0.78-1.07) | 33                                      | 0.89             | (0.61-1.29) | 137                                           | 0.92             | (0.77-1.10) |
| Weight loss ≥9 kg                                |                                                                 | 1.02                                   | (0.76-1.37) | 10                                      | N/A <sup>‡</sup> | --          | 38                                            | 0.98             | (0.71-1.37) |
| Stable weight (within +/- 2 kg)                  | Lost > 2kg                                                      | 0.92                                   | (0.83-1.02) | 104                                     | 0.85             | (0.67-1.09) | 435                                           | 0.94             | (0.84-1.05) |
|                                                  | Stable weight (within +/- 2kg)                                  | 1.00                                   | ref         | 185                                     | 1.00             | ref         | 1049                                          | 1.00             | ref         |
|                                                  | Gain >2kg                                                       | 1.05                                   | (0.96-1.15) | 125                                     | 0.93             | (0.74-1.18) | 736                                           | 1.07             | (0.97-1.18) |
| Weight loss >2-4.5 kg                            | Lost all previously<br>gained weight/lost more                  | 0.90                                   | (0.81-1.01) | 73                                      | 0.90             | (0.68-1.18) | 331                                           | 0.91             | (0.80-1.03) |
| Weight gain >4.5-<9 kg                           |                                                                 | 0.91                                   | (0.78-1.06) | 26                                      | 0.82             | (0.55-1.25) | 172                                           | 0.93             | (0.79-1.10) |
| Weight gain 9-<13.5 kg                           |                                                                 | 0.87                                   | (0.60-1.26) | 3                                       | N/A <sup>‡</sup> | --          | 26                                            | 0.91             | (0.61-1.34) |
| Weight gain ≥13.5 kg                             |                                                                 | N/A <sup>‡</sup>                       | --          | 3                                       | N/A <sup>‡</sup> | --          | 11                                            | N/A <sup>‡</sup> | --          |
| Weight gain >2-4.5 kg                            | Lost some of the previously<br>gained weight                    | N/A <sup>‡</sup>                       | --          | 1                                       | N/A <sup>‡</sup> | --          | 1                                             | N/A <sup>‡</sup> | --          |
| Weight gain >4.5-<9 kg                           |                                                                 | 1.02                                   | (0.86-1.21) | 24                                      | 1.28             | (0.84-1.97) | 122                                           | 0.98             | (0.81-1.18) |
| Weight gain 9-<13.5 kg                           |                                                                 | 0.95                                   | (0.76-1.18) | 11                                      | N/A <sup>‡</sup> | --          | 74                                            | 0.93             | (0.74-1.18) |
| Weight gain ≥13.5 kg                             |                                                                 | 1.01                                   | (0.78-1.33) | 5                                       | N/A <sup>‡</sup> | --          | 53                                            | 1.05             | (0.79-1.39) |
| Weight gain >2-4.5 kg                            | Kept the gained weight<br>on/gained more                        | 1.04                                   | (0.95-1.14) | 138                                     | 1.22             | (0.97-1.52) | 711                                           | 1.01             | (0.92-1.12) |
| Weight gain >4.5-<9 kg                           |                                                                 | 1.12                                   | (1.02-1.22) | 89                                      | 1.08             | (0.83-1.39) | 743                                           | 1.12             | (1.02-1.23) |
| Weight gain 9-<13.5 kg                           |                                                                 | 1.14                                   | (0.99-1.33) | 11                                      | N/A <sup>‡</sup> | --          | 203                                           | 1.20             | (1.03-1.40) |
| Weight gain ≥13.5 kg                             |                                                                 | 0.97                                   | (0.76-1.23) | 10                                      | N/A <sup>‡</sup> | --          | 62                                            | 0.93             | (0.71-1.20) |

Abbreviations: kg, kilogram; HR, hazard ratio; CI, confidence interval; N/A, not applicable

\*Cox models were stratified by cohort, age, and calendar year at the start of breast cancer follow-up and adjusted for physical activity at the start of Interval 1, and postmenopausal hormone therapy use at start of breast cancer follow-up.

<sup>†</sup>Weight change over both intervals modeled as a single categorical variable reflecting the weight change pattern over ~ten years. Weight change intervals were each ~5 years (Median across studies: 5.2 years for Interval 1 and 4.6 years for Interval 2).

<sup>‡</sup>Hazard ratios were not reported for categories with fewer than 15 cases.

<sup>§</sup> Cohorts with measured weight and height are Melbourne Collaborative Cohort Study and Women's Health Initiative Clinical Trial

<sup>||</sup> Cohorts with self-reported weight and height are CLUE II: Campaign Against Cancer and Heart Disease, Cancer Prevention Study II Nutrition Cohort, Iowa Women's Health Study, Japan Public Health Center-Based Study Cohort I and II, Melbourne Collaborative Cohort Study, New York University Women's Health Study, Nurses' Health Study, and Women's Health Study

\*\*All statistical tests are two sided.
